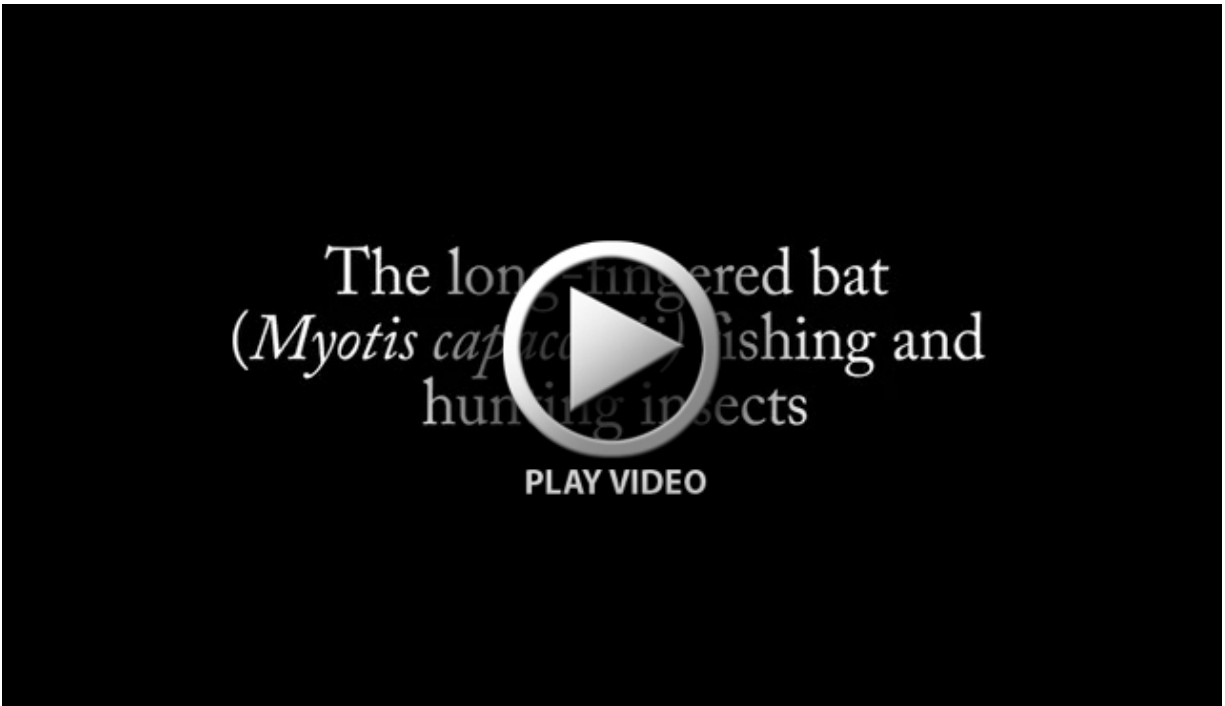

**Movie 1. Long-fingered bats hunting insects (small and large) and fishing.** Notice the feet insertion depth and dip duration in each attack.
